# Supplementary material for: Influence of invasive aspergillosis during acute leukaemia treatment on survival after allogeneic stem cell transplantation: a prospective study of the EBMT Infectious Diseases Working Party
Source: PubMed Central journal article supplement — eClinicalMedicine. 2023 Dec 22;67:102393. doi: 10.1016/j.eclinm.2023.102393 (PMC10751840; doi:10.1016/j.eclinm.2023.102393), 2023-12-22
Supplement: mmc1.pdf [file mmc1.pdf]

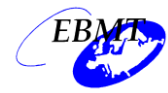

Study number: IDWP 8414113

|                                                                                                                                                                                                                  |                                                                                    |
|------------------------------------------------------------------------------------------------------------------------------------------------------------------------------------------------------------------|------------------------------------------------------------------------------------|
| <p><b>Impact of<br/>pre-existing invasive aspergillosis<br/>on allo-HSCT<br/>for treatment of acute leukaemia and<br/>myelodysplastic syndrome</b></p> <p>EBMT/IDWP<br/>Non-Interventional Prospective Study</p> | <p><b>Invasive<br/>aspergillus<br/>form</b></p> <p>01 MAY 2016 - 30 APRIL 2017</p> |
|------------------------------------------------------------------------------------------------------------------------------------------------------------------------------------------------------------------|------------------------------------------------------------------------------------|

**PATIENT IDENTIFICATION**

Centre number (CIC) .....

Patient Unique Identification Code (UIC): ..... Hospital Unique Patient Number: .....

Date of birth: ..... Sex :  Male  Female  
dd mm yyyy

**EVIDENCE OF INVASIVE ASPERGILLUS PRE- OR POST ALLO-HSCT**

|                          |                                                                                                                                          | <b>Type of mycosis</b>                                                                                         |
|--------------------------|------------------------------------------------------------------------------------------------------------------------------------------|----------------------------------------------------------------------------------------------------------------|
| <input type="checkbox"/> | Clinical Evidence +<br>Mycological evidence (Galactomannan or Beta D-Glucan or culture on Bronchial Alveolar Lavage (BAL) or nasal wash) | <u>Probable</u><br>Please complete the rest of this form                                                       |
| <input type="checkbox"/> | Culture or Microscopy histology in tissue                                                                                                | <u>Proven</u><br>Please complete the rest of this form                                                         |
| <input type="checkbox"/> | No evidence                                                                                                                              | <u>Possible / No IA</u><br>No need to complete this form.<br>Please proceed to the follow up form(s) when due. |

(when not sure which type, this form will help us assign –and to check the assigned- cases to the groups.)

Study number: IDWP 8414113

## EVIDENCE OF INVASIVE ASPERGILLUS

### DATE OF DIAGNOSIS OF INVASIVE ASPERGILLOSIS

..... / ..... / ..... (if exact date is not known please indicate month and year)  
*dd mm yyyy*

### ORGAN INVOLVEMENT

#### Which organs were involved?

- Lung     single nodule      $\geq 2$  nodules ;     lung monolateral     lungs bilateral  
 Central nervous system (CNS)  
 Other (e.g. digestive tract, spleen, kidney, heart): \_\_\_\_\_  
 no record

### CLINICAL EVIDENCE

#### Was a pulmonary CT-scan done?

- yes  
 no  
 no record

#### If YES, specify the observations on the pulmonary CT-scan.

- dense, well-circumscribed lesion(s) *with* a halo sign  
 dense, well-circumscribed lesion(s) *without* a halo sign  
 air-crescent sign  
 cavity  
 wedge-shaped infiltrates  
 other infiltrates, specify \_\_\_\_\_  
 no abnormalities

#### If NO CT-scan done, was a chest X-ray done?

- yes  
 no  
 no record

#### If YES, specify the observations on the chest X-ray.

- air-crescent sign  
 cavity  
 wedge-shaped infiltrates  
 other infiltrates, specify \_\_\_\_\_  
 no abnormalities

Study number: IDWP 8414113

**MYCOLOGICAL EVIDENCE****1) In Blood****Galactomannan**

Plasma or serum obtained?

- yes  
 no  
 no record

If YES:

- $\geq 2$  samples with index  $\geq 0.5$   
 single sample with index  $\geq 1.0$   
 all samples with index  $< 0.5$

Serum B-D Glucan obtained?

- yes  
 no  
 no record

If YES:

- $\geq 2$  samples with cut-off of \_\_\_\_\_pg/ml  
 single sample with cut-off of \_\_\_\_\_pg/ml

PCR  Whole blood  plasma  serum obtained?

- yes  
 no  
 no record

If YES:

- Aspergillus* detected  
 no *Aspergillus* detected

**2) In Bronchial Alveolar Lavage Fluid (BAL)****Galactomannan BAL obtained?**

- yes  
 no  
 no record

If YES:

- single sample with index  $\geq 1.0$   
 single sample with index  $< 1.0$

Study number: IDWP 8414113

**Microscopy BAL obtained?**

- yes  
 no  
 no record

**If YES:**

- hyphae consistent with *Aspergillus* seen  
 hyphae consistent with other mould seen  
 no hyphae seen

**Culture BAL obtained?**

- yes  
 no  
 no record

**If YES:**

- Aspergillus fumigatus*  
 other *Aspergillus*, specify \_\_\_\_\_  
 other mould  
 no mould

**PCR BAL obtained?**

- yes  
 no  
 no record

**If YES:**

- Aspergillus* detected  
 no *Aspergillus* detected

### 3) In Lung Biopsy

**Biopsy obtained?**

- yes  
 no  
 no record

**If YES:**

- Aspergillus fumigatus*  
 other *Aspergillus*, specify \_\_\_\_\_  
 other mould  
 no mould

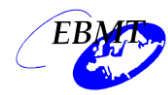

Study number: IDWP 8414113

#### 4) In Sputum

**Sputum obtained?**

- yes
- no
- no record

**If YES:**

- Aspergillus fumigatus*
- other *Aspergillus*, specify \_\_\_\_\_
- other mould
- no mould

**ADDITIONAL NOTES IF APPLICABLE**

**COMMENTS**.....  
.....

**IDENTIFICATION & SIGNATURE**

.....
