# Supplementary material for: Influence of invasive aspergillosis during acute leukaemia treatment on survival after allogeneic stem cell transplantation: a prospective study of the EBMT Infectious Diseases Working Party
Source: PubMed Central journal article supplement — eClinicalMedicine. 2023 Dec 22;67:102393. doi: 10.1016/j.eclinm.2023.102393 (PMC10751840; doi:10.1016/j.eclinm.2023.102393), 2023-12-22
Supplement: mmc2.pdf [file mmc2.pdf]

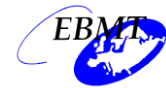

CIC:..... UPN .....

Study number: IDWP 8414113

**TO BE COMPLETED AT 1 YEAR AFTER HSCT**

|                                                                 |                                                                                                                                                                                                                                             |
|-----------------------------------------------------------------|---------------------------------------------------------------------------------------------------------------------------------------------------------------------------------------------------------------------------------------------|
| <p>MED C</p> <p>STUDY FORM</p> <p>To be completed at Year 1</p> | <p>Impact of</p> <p><b>pre-existing invasive aspergillosis</b></p> <p>on allo-HSCT</p> <p>for treatment of acute leukaemia and</p> <p>myelodysplastic syndrome</p> <p>EBMT/IDWP Non-Interventional Prospective Study</p> <p><b>TEAM</b></p> |
|-----------------------------------------------------------------|---------------------------------------------------------------------------------------------------------------------------------------------------------------------------------------------------------------------------------------------|

To be completed by EBMT:

Received:

Entered:

Checked:

EBMT Centre Identification Code (CIC) .....

Hospital .....

Contact person: ..... e-mail .....

**IDENTIFICATION**

Unique Identification Code (UIC) ..... (to be entered only if patient previously reported)

Hospital Unique Patient Number (UPN) .....

Date of birth .....  
                                  yyyy          mm          dd

Date of 1-Year assessment .....  
                                  yyyy          mm          dd

**INVASIVE ASPERGILLUS DAY +101-365**

**Did the patient develop proven/probable IA between day 101 and day +365 after HSCT?**

- no
- yes (please use the table at the end of the form)

How do you consider this episode: new episode of IA:  yes  no



CIC:..... UPN .....

**Study number: IDWP 8414113**

**Did the same patient also develop proven/probable IA between day 0 and day + 100 after HSCT**

- no  
 yes Did this previous episode of IA progress after day + 100:  yes  no

**Did the patient develop CMV reactivation IA between day 101 and day +365 after HSCT after HSCT (> 1 pp65 cell or 1000 GE/ml blood)?**

- yes date ..... - ..... - ..... (first day of treatment)  
 yyyy mm dd  
 no  
 not applicable (R/D: neg/neg)

**DEVELOPMENT OF PROBABLE OR PROVEN INVASIVE FUNGAL DISEASE OTHER THAN INVASIVE ASPERGILLOSIS?**

Diagnosis of invasive fungal disease other than IA during the first year after HSCT?  yes  no  
 If yes, which type:

- Invasive Candidiasis Date ..... - ..... - .....  
 yyyy mm dd  
 Zygomycosis Date ..... - ..... - .....  
 yyyy mm dd  
 Fusariosis Date ..... - ..... - .....  
 yyyy mm dd  
 Other : \_\_\_\_\_ Date ..... - ..... - .....  
 yyyy mm dd

**ASPERGILLUS ACTIVE ANTIFUNGAL PROPHYLAXIS, between day + 101 and + 365:**  yes  no  unknown

If yes, which:

|                          | drug         | Start date (yyyy/mm/dd) | Stop date (yyyy/mm/dd) |
|--------------------------|--------------|-------------------------|------------------------|
| <input type="checkbox"/> | voriconazole |                         |                        |
| <input type="checkbox"/> | posaconazole |                         |                        |
| <input type="checkbox"/> | itraconazole |                         |                        |
| <input type="checkbox"/> | IV ambisome  |                         |                        |
| <input type="checkbox"/> | echinocandin |                         |                        |
| <input type="checkbox"/> | other        |                         |                        |

**HAS MED-A OR MED-B BEEN SUBMITTED FOR THE DAY+100 ASSESSMENT OF THIS PATIENT?**

- No. Med-A or MED B will be submitted asap.  
 Yes:  Entered directly onto EBMT database  
 Paper form sent to EBMT Registry, London  
 Paper form sent to National Registry



CIC:..... UPN .....

**Study number: IDWP 8414113**

**ADDITIONAL NOTES IF APPLICABLE**

**COMMENTS**.....  
 .....

**IDENTIFICATION & SIGNATURE**

.....

**TABLE FOR VERIFICATION OF PRESENCE OF INVASIVE ASPERGILLOSIS**  
 (when not sure which type, please complete the Invasive Aspergillus form. It will help us assign –and to check the assigned- cases to the groups.)

|                                                                                                                                          | <b>Type of mycosis</b>                                                                            |
|------------------------------------------------------------------------------------------------------------------------------------------|---------------------------------------------------------------------------------------------------|
| Clinical Evidence +<br>Mycological evidence (Galactomannan or Beta D-Glucan or culture on Bronchial Alveolar Lavage (BAL) or nasal wash) | <b><u>Probable</u></b><br>Please complete the rest of this form and the Invasive Aspergillus Form |
| Culture or Microscopy histology in tissue                                                                                                | <b><u>Proven</u></b><br>Please complete the rest of this form and the Invasive Aspergillus Form   |
| No evidence                                                                                                                              | <b><u>Possible / No IA</u></b><br>Please complete the rest of this form                           |
