# Supplementary material for: Influence of invasive aspergillosis during acute leukaemia treatment on survival after allogeneic stem cell transplantation: a prospective study of the EBMT Infectious Diseases Working Party
Source: PubMed Central journal article supplement — eClinicalMedicine. 2023 Dec 22;67:102393. doi: 10.1016/j.eclinm.2023.102393 (PMC10751840; doi:10.1016/j.eclinm.2023.102393), 2023-12-22
Supplement: mmc3.pdf [file mmc3.pdf]

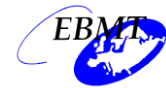

CIC:..... UPN .....

Study number: IDWP 8414113

**TO BE COMPLETED AT DAY +100**

|                                                                  |                                                                                                                                                                                                                                      |
|------------------------------------------------------------------|--------------------------------------------------------------------------------------------------------------------------------------------------------------------------------------------------------------------------------------|
| <p>MED C</p> <p>STUDY FORM</p> <p>To be completed at Day+100</p> | <p><b>Impact of<br/>pre-existing invasive aspergillosis<br/>on allo-HSCT<br/>for treatment of acute leukaemia and<br/>myelodysplastic syndrome</b></p> <p>EBMT/IDWP/ALWP Non-Interventional Prospective Study</p> <p><b>TEAM</b></p> |
|------------------------------------------------------------------|--------------------------------------------------------------------------------------------------------------------------------------------------------------------------------------------------------------------------------------|

|                          |
|--------------------------|
| To be completed by EBMT: |
| Received:                |
| Entered:                 |
| Checked:                 |

EBMT Centre Identification Code (CIC) .....

Hospital .....

Contact person: ..... e-mail .....

**IDENTIFICATION**

Patient Unique Identification Code (UIC) ..... (to be entered only if patient previously reported)

Hospital Unique Patient Number (UPN) .....

Date of birth .....  
                                yyyy                mm                dd

Date of day+100 assessment .....  
                                                yyyy                mm                dd

**INVASIVE ASPERGILLUS DAY+0-100**

**Did the patient develop proven/probable IA after HSCT, between day 0 and day +100?**

- no
- yes

**Did this patient have a history of pre-hsct proven-probable IA?**  yes  no

**If yes, do you consider this episode as**  new episode or  progression of pre-HSCT episode of IA

**please complete the IA form**

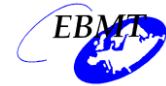

CIC:..... UPN .....

Study number: IDWP 8414113

**Did the patient develop CMV reactivation after HSCT between day 0 and day + 100 (> 1 pp65 cell or 1000 GE/ml blood)?**

- yes date ..... - ..... - ..... (first day of treatment)  
 yyyy mm dd
- no
- not applicable (R/D: neg/neg)

**DEVELOPMENT OF PROBABLE OR PROVEN INVASIVE FUNGAL DISEASE OTHER THAN INVASIVE ASPERGILLOSIS?**

Diagnosis of invasive fungal disease other than IA during the first 100 days after HSCT?

- yes  no  unknown

If yes, which type:

- Invasive Candidiasis Date ..... - ..... - .....  
 yyyy mm dd
- Zygomycosis Date ..... - ..... - .....  
 yyyy mm dd
- Fusariosis Date ..... - ..... - .....  
 yyyy mm dd
- Other : \_\_\_\_\_ Date ..... - ..... - .....  
 yyyy mm dd

**Aspergillus active antifungal prophylaxis, between day 0 and day + 100**

- yes  no  unknown

If yes, which:

|                          | drug         | Start date (yyyy/mm/dd) | Stop date (yyyy/mm/dd) |
|--------------------------|--------------|-------------------------|------------------------|
| <input type="checkbox"/> | voriconazole |                         |                        |
| <input type="checkbox"/> | posaconazole |                         |                        |
| <input type="checkbox"/> | itraconazole |                         |                        |
| <input type="checkbox"/> | IV ambisome  |                         |                        |
| <input type="checkbox"/> | echinocandin |                         |                        |
| <input type="checkbox"/> | other        |                         |                        |

**HAS MED-A OR MED-B BEEN SUBMITTED FOR THE DAY+100 ASSESSMENT OF THIS PATIENT?**

- No. Med-A or MED B will be submitted asap.
- Yes:  Entered directly onto EBMT database  
 Paper form sent to EBMT Registry, London  
 Paper form sent to National Registry



CIC:..... UPN .....

**Study number: IDWP 8414113**

**ADDITIONAL NOTES IF APPLICABLE**

**COMMENTS**.....

**IDENTIFICATION & SIGNATURE**

.....

**TABLE FOR VERIFICATION OF PRESENCE OF INVASIVE ASPERGILLOSIS**

(when not sure which type, please complete the Invasive Aspergillus form. It will help us assign –and to check the assigned- cases to the groups.)

|                                                                                                                                          | <b>Type of mycosis</b>                                                                            |
|------------------------------------------------------------------------------------------------------------------------------------------|---------------------------------------------------------------------------------------------------|
| Clinical Evidence +<br>Mycological evidence (Galactomannan or Beta D-Glucan or culture on Bronchial Alveolar Lavage (BAL) or nasal wash) | <b><u>Probable</u></b><br>Please complete the rest of this form and the Invasive Aspergillus Form |
| Culture or Microscopy histology in tissue                                                                                                | <b><u>Proven</u></b><br>Please complete the rest of this form and the Invasive Aspergillus Form   |
| No evidence                                                                                                                              | <b><u>Possible / No IA</u></b><br>Please complete the rest of this form                           |
