# Supplementary material for: Influence of invasive aspergillosis during acute leukaemia treatment on survival after allogeneic stem cell transplantation: a prospective study of the EBMT Infectious Diseases Working Party
Source: PubMed Central journal article supplement — eClinicalMedicine. 2023 Dec 22;67:102393. doi: 10.1016/j.eclinm.2023.102393 (PMC10751840; doi:10.1016/j.eclinm.2023.102393), 2023-12-22
Supplement: mmc4.pdf [file mmc4.pdf]

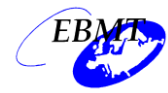

Study number: IDWP 8414113

# Impact of pre-existing invasive aspergillosis on allo-HSCT for treatment of acute leukaemia and myelodysplastic syndrome

EBMT/IDWP  
Non-Interventional Prospective Study

## PATIENT REGISTRATION

01 MAY 2016 - 30 APRIL 2017

### PATIENT IDENTIFICATION

Centre number (CIC) .....

Patient Unique Identification Code (UIC): ..... Hospital Unique Patient Number: .....

Date of birth: ..... - ..... - .....  
*dd mm yyyy*Sex :  Male  Female

### INCLUSION CRITERIA

Diagnosis ALL  AML  MDSTransplant type **first** allogeneic transplant (inclusion criterion) (previous autologous transplant is permitted)

### TRANSPLANT

TRANSPLANT DATE ..... - ..... - .....  
*yyyy mm dd***HLA MATCH TYPE** (*DONOR RELATION WITH PATIENT*) HLA-identical sibling (*may include non-monozygotic twin*) Syngeneic (*monozygotic twin*)  HLA-matched other relative HLA-mismatched relative: Unrelated donor  matched HLA alleles  8/8 or 10/10 mismatched HLA alleles  7/8 or 9/10 < 7/8 or <9/10 (e.g. 6/8, 8/10)Please continue on the next page



Study number: IDWP 8414113

## HISTORY OF INVASIVE ASPERGILLOSIS

**PATIENT HISTORY (PLEASE USE THE TABLE BELOW AND TICK WHICH ONE APPLIES)**

- History of probable/proven invasive aspergillosis
- No history of probable/proven invasive aspergillosis

**HISTORY OR PRESENCE OF PROVEN INVASIVE MOULD INFECTIONS OTHER THAN IA (E.G. FUSARIOSIS, ZYGOMYCOSIS)?**

- no
- yes

**Table for verification of history of presence of invasive aspergillosis**

(when not sure which type, please complete the Invasive Aspergillus form. It will help us assign –and to check the assigned- cases to the groups.)

|                                                                                                                                          | <b>Type of mycosis</b>                                                                                                               |
|------------------------------------------------------------------------------------------------------------------------------------------|--------------------------------------------------------------------------------------------------------------------------------------|
| Clinical Evidence +<br>Mycological evidence (Galactomannan or Beta D-Glucan or culture on Bronchial Alveolar Lavage (BAL) or nasal wash) | <b><u>Probable</u></b><br>Please complete the Invasive Aspergillus Form                                                              |
| Culture or Microscopy histology in tissue                                                                                                | <b><u>Proven</u></b><br>Please complete the Invasive Aspergillus Form                                                                |
| No evidence                                                                                                                              | <b><u>Possible / No IA</u></b><br>No need to complete the Invasive Aspergillus form. Please complete the follow up form(s) when due. |

**HAS THE NEW MED-A, VERSION 21/12/2015, OR MED-B BEEN SUBMITTED FOR THE LAST HSCT OF THIS PATIENT?**

- No. Med-A or MED B will be submitted asap.
- Yes:
  - Entered directly onto EBMT database
  - Paper form sent to EBMT Registry, London
  - Paper form sent to National Registry

## ADDITIONAL NOTES IF APPLICABLE

**COMMENTS**.....  
 .....  
 .....

## IDENTIFICATION & SIGNATURE

.....
